# Supplementary material for: A miR-192-EGR1-HOXB9 regulatory network controls the angiogenic switch in cancer
Source: PubMed Central journal article supplement (PMC4822037; doi:10.1038/ncomms11169), 2016-04-04
Supplement: ncomms11169-s1.pdf [file ncomms11169-s1.pdf]

## Supplementary Figures

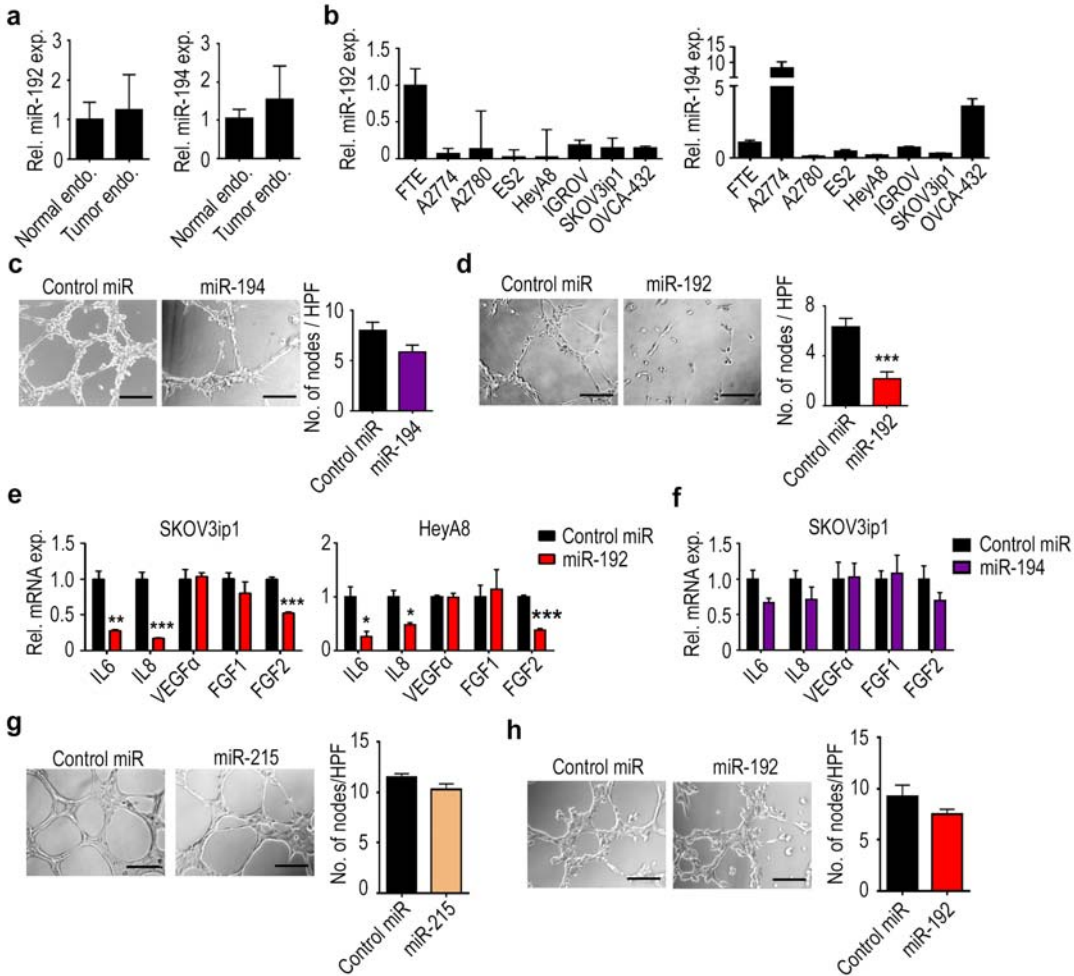

**Supplementary Figure 1. The effects of miR-192 and miR-194 on angiogenesis.** (a) The expression of miR-192 and miR-194 in endothelial cells isolated from normal ovary (n=3) or ovarian tumors (n=3). (b) Expression of miR-192 and miR-194 in a panel of ovarian cancer cells. Fallopian tube epithelial (FTE) cells were used as a control. (c) Tube formation potential of RF24 cells was assessed after exposure to conditioned media collected from SKOV3ip1 cells treated with control miRNA or miR-194 (48 hrs post transfection). Tube formation was assessed 6 hrs post incubation (n=5). (d) The effect of miR-192 on tube formation potential. RF24 cells were exposed to conditioned media collected from HeyA8 cells treated with control miRNA or miR-192 (48 hrs post transfection, n=5, student *t*-test). (e) mRNA levels of several important angiogenic factors following control miRNA or miR-192 transfection in SKOV3ip1 or HeyA8 cells (n=3, student *t*-test). (f) mRNA levels of angiogenic factors following control miRNA or miR-194 transfection in SKOV3ip1 cells (n=3). (g) The effect of miR-215 on tube formation potential. RF24 cells were exposed to conditioned media collected from SKOV3ip1 cells treated with control miRNA or miR-215 (n=5). (h) Tube formation potential of RF24-Control miR and RF24-miR-192 stable expressing cells (n=5). Scale bar, 100  $\mu$ m. All bars and error bars represent mean values and the corresponding SEMs. (\*,  $P < 0.05$ ; \*\*,  $P < 0.01$ ; and \*\*\*,  $P < 0.001$ ).

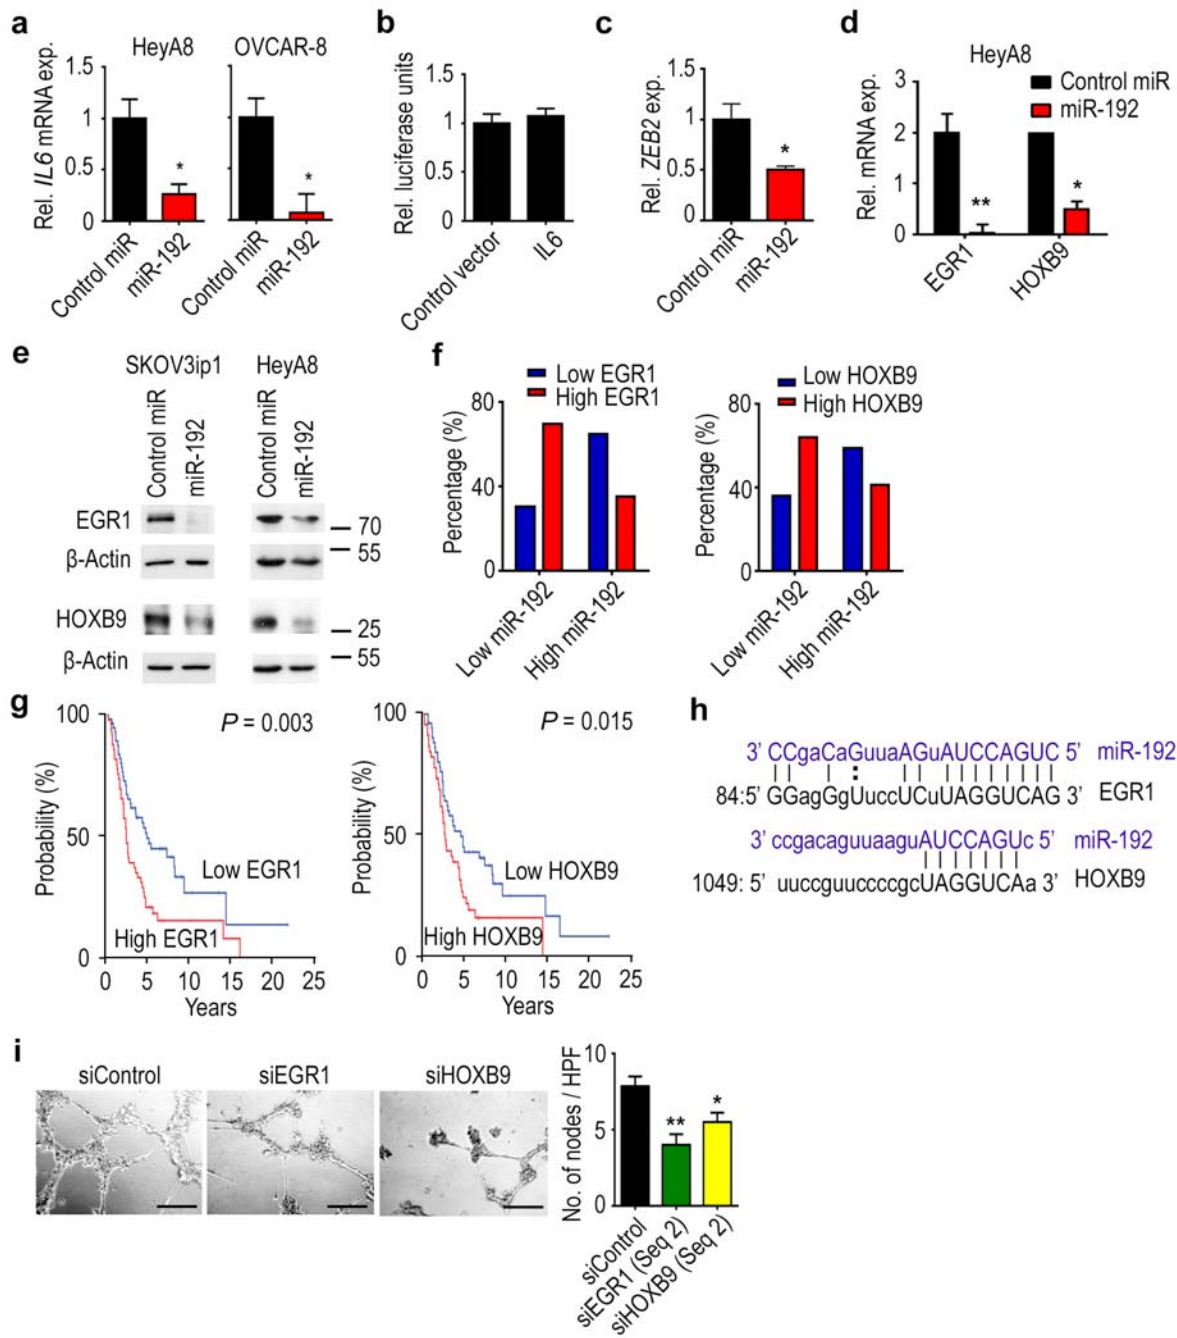

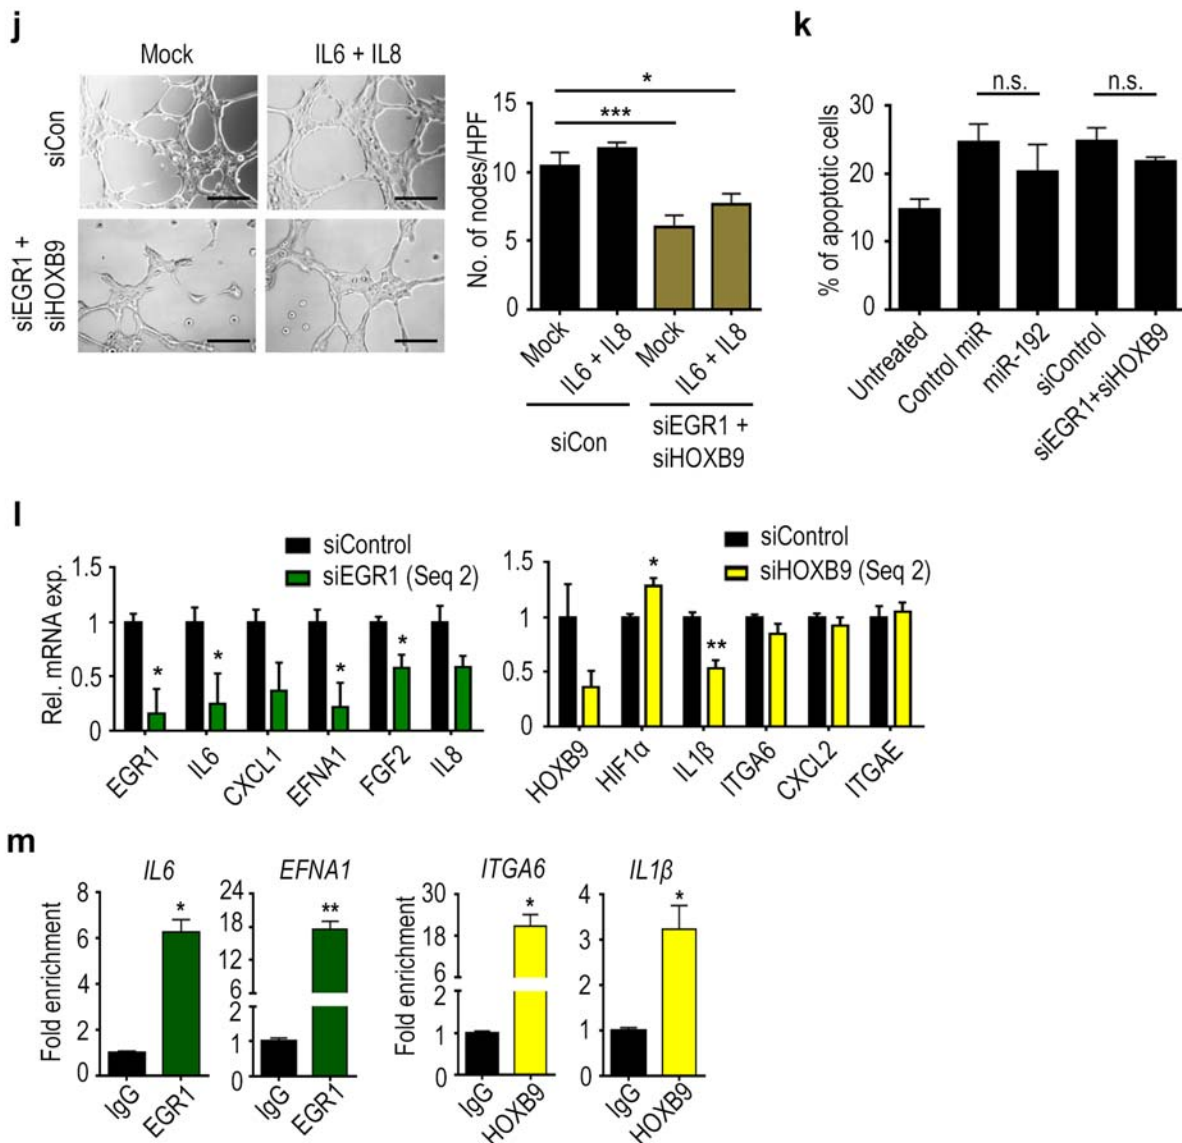

**Supplementary Figure 2. The mechanism by which miR-192 mediates its broad anti-angiogenic function.** (a) The effect of miR-192 on *IL6* level in HeyA8 and OVCAR-8 cells. mRNA levels were assessed at 48 hrs post-transfection (n=3, student *t*-test). (b) Relative luciferase activity normalized to empty control for *IL6* 3'-UTR. SKOV3ip1 cells were transfected with miR-192 and UTR luciferase constructs and luciferase assay was performed at 24 hrs post transfection (n=5, student *t*-test). (c) Effect of miR-192 treatment on *ZEB2* expression in SKOV3ip1 cells. mRNA levels were assessed at 48 hrs post transfection (n=3, student *t*-test). (d) Effect of miR-192 on EGR1 and HOXB9 mRNA levels in HeyA8 cells at 24 hrs post-transfection (n=3, student *t*-test). (e) Effect of miR-192 on EGR1 and HOXB9 protein levels at 48 hrs post-transfection in SKOV3ip1 and HeyA8 cells. (f) Correlation between miR-192 expression and EGR1 and HOXB9 protein levels in human ovarian epithelial tumors. Tumors were dichotomized into high vs. low

EGR1 or HOXB9 expression groups and the percentages of patients in each of these groups were assessed in tumors with high vs. low miR-192 expression (n=98, Chi-square test). **(g)** The impact of tumoral EGR1 or HOXB9 protein expression on overall survival in ovarian cancer patients (n=98, log-rank test). **(h)** Predicted miR-192 binding sites for *EGR1* and *HOXB9*. **(i)** Tube formation potential was assessed in RF24 cells after exposing to conditioned media collected from HeyA8 cells treated with siEGR1 or siHOXB9 (48 hrs post-transfection, n=5, student *t*-test). **(j)** Tube formation assay in RF24 cells following incubation with conditioned media collected from SKOV3ip1 cells treated with control siRNA or siEGR1+siHOXB9 (48 hrs post- transfection). The assay was performed in the presence or absence of IL-6 (8,000 pg/mL) and IL-8 (13,000 pg/mL). Bar graph shows the quantitative analyses of the number of nodes per HPF (n=5, student *t*-test). **(k)** The effect of miR-192 and siEGR1+siHOXB9 treatments on the survival of RF24 cells. RF24 cells were exposed to conditioned media collected from SKOV3ip1 cells treated with miR-192 or siEGR1+siHOXB9 (48 hrs post- treatment). After 6 hrs of exposure, the number of apoptotic cells was assessed *via* Annexin V and propidium iodide staining (n=3, student *t*-test). **(l)** Effect of EGR1 or HOXB9 silencing on levels of angiogenic factors in HeyA8 cells. RNA was isolated at 48 hours post transfection (n=3, student *t*-test). **(m)** Binding of EGR1 or HOXB9 to the promoter regions of *IL6*, *EFNA1*, *ITGA6*, or *IL1 $\beta$*  in SKOV3ip1 cells (n=2, student *t*-test). Scale bar, 100  $\mu$ m. All bars and error bars represent mean values and the corresponding SEMs (\*,  $P < 0.05$ ; \*\*,  $P < 0.01$ ; and \*\*\*,  $P < 0.001$ ).

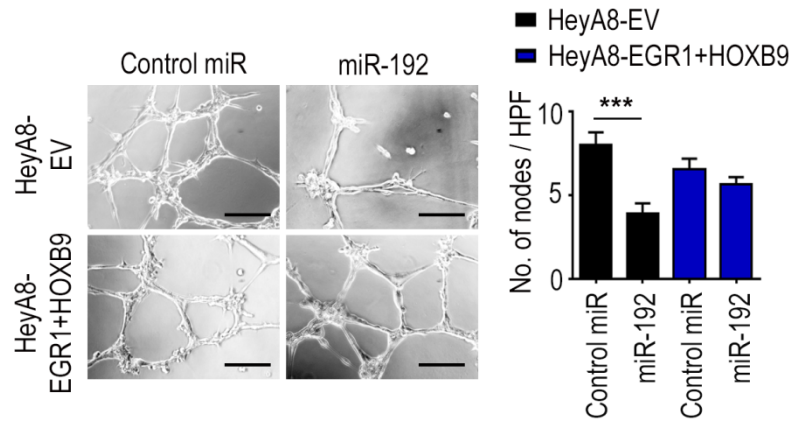

**Supplementary Figure 3. The role of EGR1 and HOXB9 in mediating the anti-angiogenic effect of miR-192.** RF24 cells were incubated with conditioned media collected from control miRNA or miR-192 treated HeyA8-EV or HeyA8-EGR1+HOXB9 cells (48 hrs post-transfection). Tube formation potential was assessed at 6 hrs post-incubation (n=5, student *t*-test). Scale bar, 100  $\mu$ m. Bars and error bars represent mean values and the corresponding SEMs (\*\*\*,  $P < 0.001$ ).

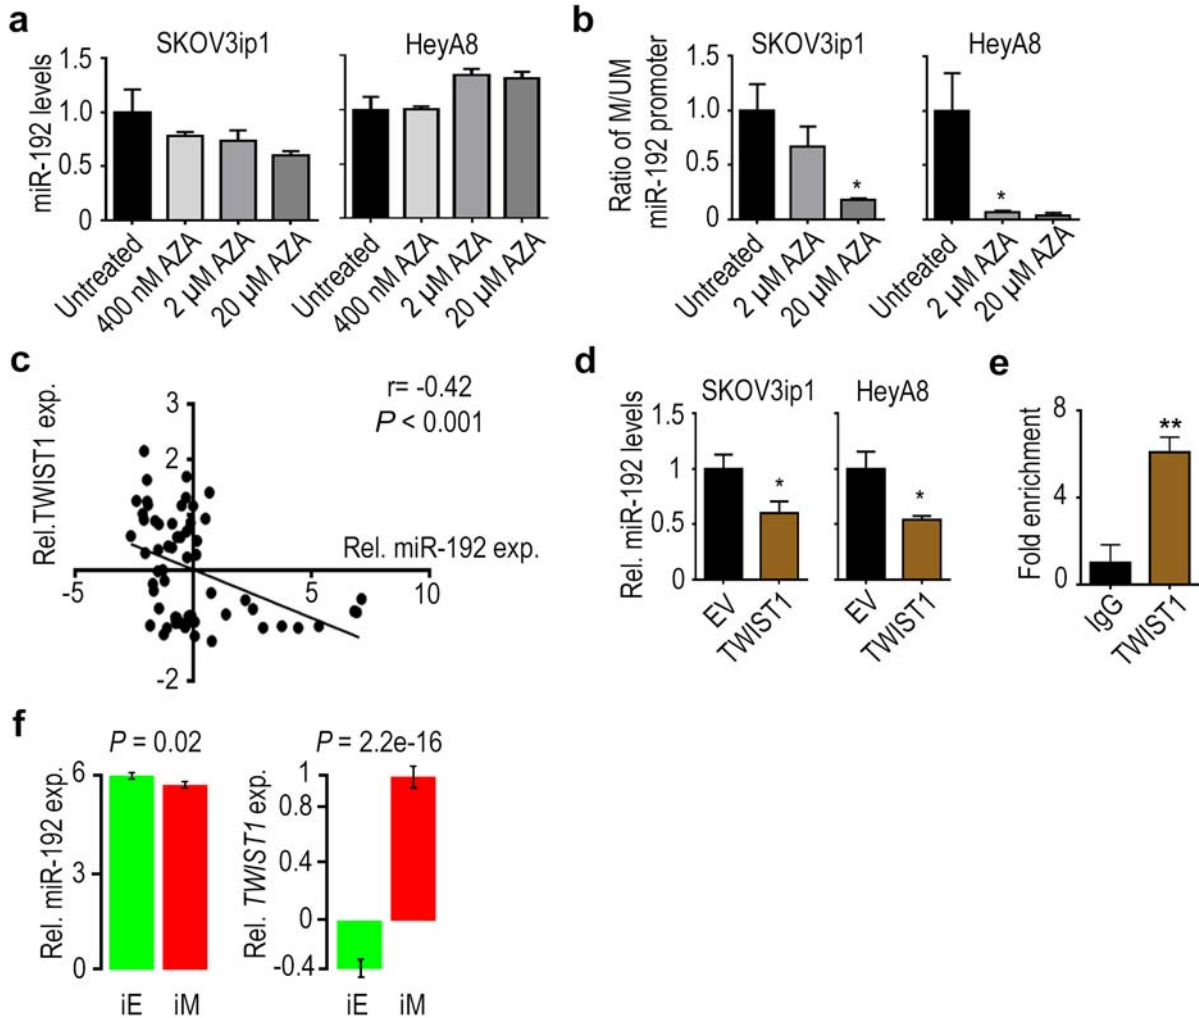

**Supplementary Figure 4. Upstream regulation of miR-192.** (a) MiR-192 expression level at 72 hrs following azacitidine (AZA) treatment in SKOV3ip1 and HeyA8 cells. (b) The effect of azacitidine on the ratios of methylated (M) / unmethylated (UM) miR-192 promoter levels (n=3, student *t*-test). (c) Correlation between miR-192 and *TWIST1* expression in NCI-60 cell line database ( $P < 0.001$ , Spearman correlation test). (d) Effect of *TWIST1* expression on miR-192 levels in SKOV3ip1 and HeyA8 cells. Empty vector transfected cells were used as the control (n=3, student *t*-test). (e) Binding of *TWIST1* to the promoter regions of miR-192 in OVCA-432 high-grade serous ovarian cancer cells (n=2, student *t*-test). (f) Relative *TWIST1* and miR-192 expression in integrative epithelial (iE) vs. integrative mesenchymal (iM) subtype of ovarian tumors (n=459, Wilcoxon rank-sum test). All bars and error bars represent mean values and the corresponding SEMs (\*,  $P < 0.05$ ; \*\*,  $P < 0.01$ ).

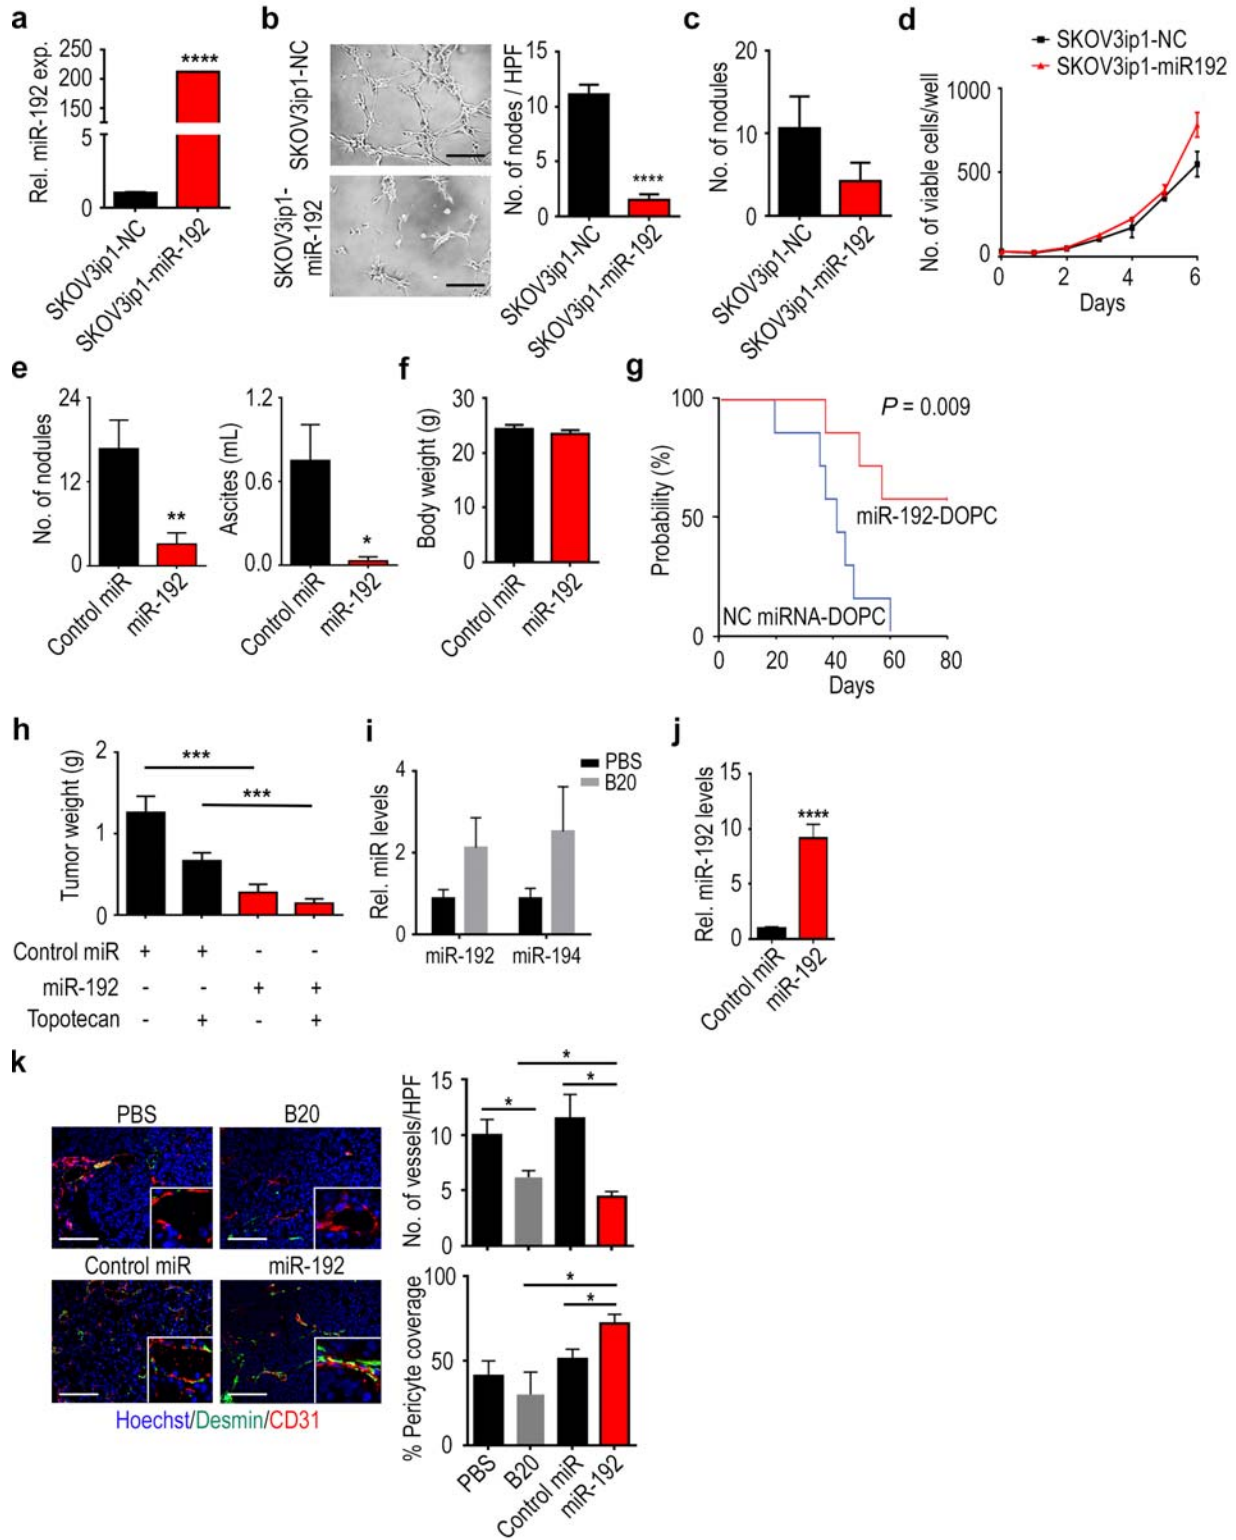

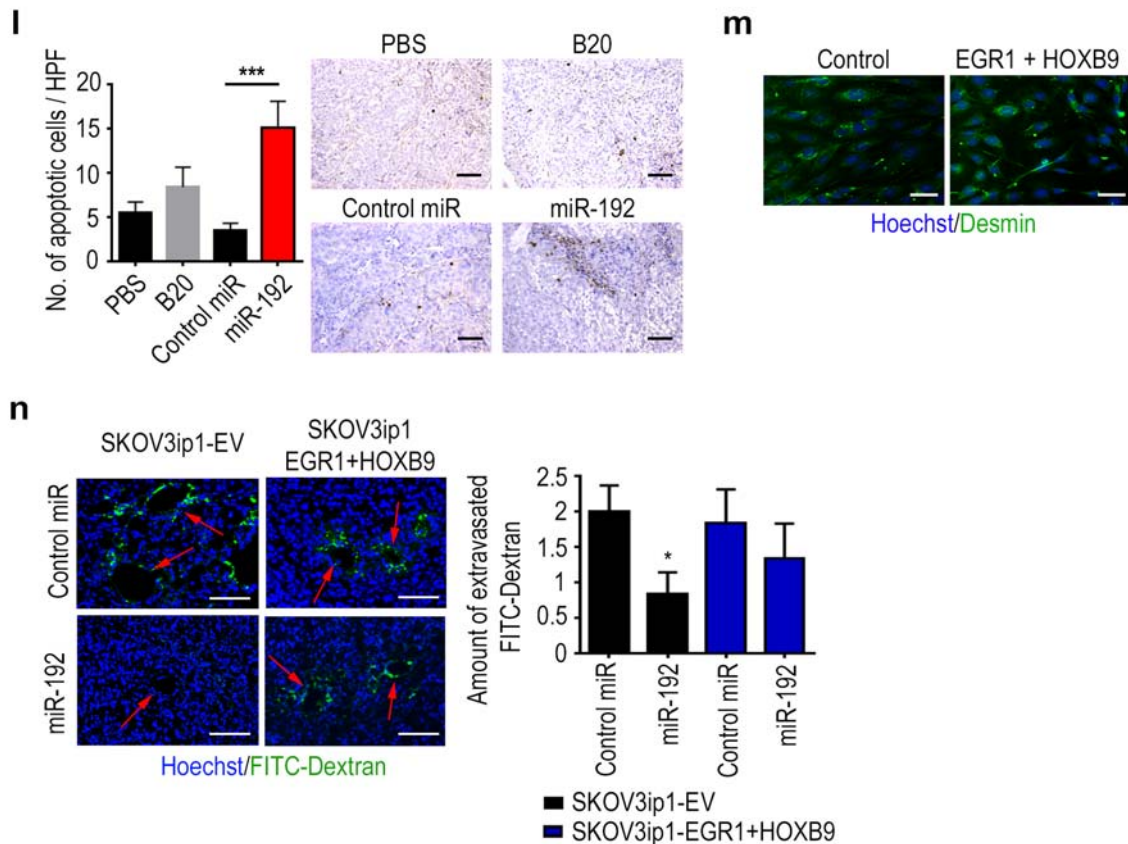

**Supplementary Figure 5. *In vivo* effects of miR-192 in mouse models of ovarian cancer.** (a) Expression of miR-192 in SKOV3ip1-NC and SKOV3ip1-miR-192 cells (n=3, student *t*-test). (b) Tube formation potential of RF24 cells treated with conditioned media collected from SKOV3ip1-NC and SKOV3ip1-miR-192 cells (n=5, student *t*-test). Both cell lines were seeded at 300,000 cells per well and conditioned media was collected at 48 hrs post seeding. Scale bar, 100  $\mu$ m. (c) Number of tumor nodules in mice bearing SKOV3ip1-NC or SKOV3ip1-miR-192 tumors. (d) The effect of miR-192 expression on growth of SKOV3ip1 cells *in vitro* (n=3). (e) The effect of miR-192-DOPC therapy on the number of tumor nodules and volume of ascites in SKOV3ip1 tumor bearing mice (n=10, student *t*-test). (f) The effects of miR-192-DOPC therapy on mouse body weight (n=10). (g) The impact of miR-192-DOPC treatment on survival in mice. Mice bearing SKOV3ip1 tumors were treated with control miRNA-DOPC or miR-192-DOPC twice weekly. A Kaplan Meier curve was used to analyze the survival difference between control and treatment groups (n=7, log-rank test). (h) The effect of miR-192-DOPC on tumor burden in mice bearing SKOV3ip1 tumors treated with control miRNA-DOPC, miR-192-DOPC, and/or topotecan (n=10, student *t*-test). The effect of (i) B20 or (j) miR-192-DOPC treatment on tumoral miR-192 and/or miR-194 expression (n=5, student *t*-test). The impact of B20 and miR-192-DOPC treatment on (k) MVD and vessel pericyte coverage and (l) tumor cell apoptosis (n=5, student *t*-test). (m) The effect of EGR1 and HOXB9 expression on desmin levels in pericyte-like 10T1/2 cells. 10T1/2 cells were exposed to conditioned media collected from control or EGR1+HOXB9 expressing SKOV3ip1 cells for 48 hrs and desmin expression was assessed *via* immunofluorescence. (n)



Representative images of Hoechst 33342 (blue) and FITC-dextran (green) in SKOV3ip1-EV and EGR1+HOXB9 tumors (n=3, student *t*-test). 0 points, no staining; 1 point, focal or <25%; 2 points, 25–50%, 3 points, 50-75%, and 4 points, 75-100% FITC-dextran. Red arrows indicate the location of blood vessels. Scale bar, 50  $\mu$ m. All bars and error bars represent mean values and the corresponding SEMs (\*,  $P<0.05$ ; \*\*,  $P<0.01$ ; \*\*\*,  $P<0.001$ ; and \*\*\*\*,  $P<0.0001$ ).

**a**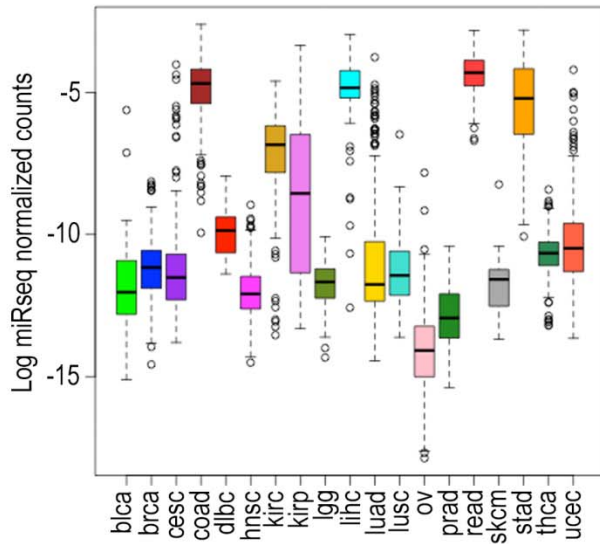**b**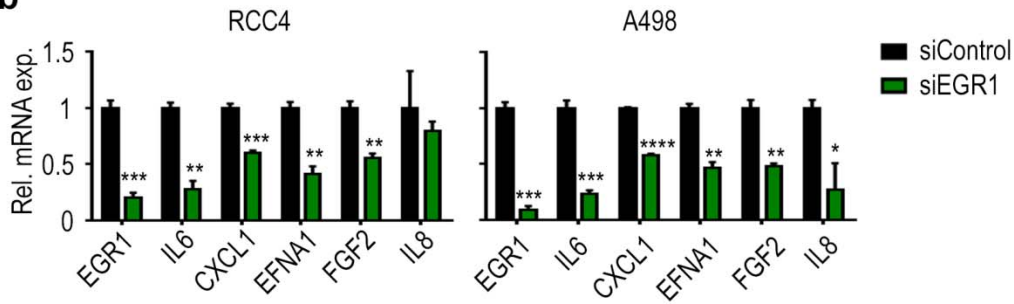**c**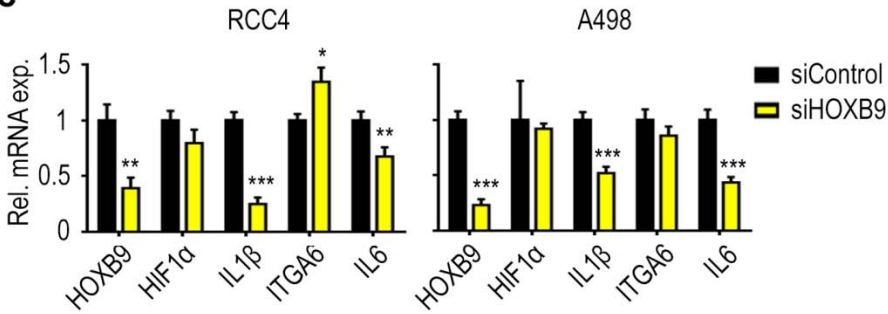**d**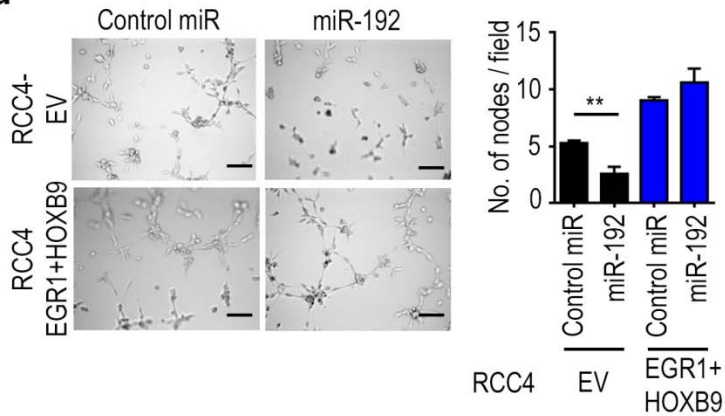

**Supplementary Figure 6. The expression and functional effect of miR-192 in renal tumors.** (a) The expression of miR-192 in tumors across 19 cancer types in TCGA databases. The horizontal lines represent the median normalized expression levels. The bottom and the top lines in each individual box represent the first and the third quartile expression levels, respectively. Bladder urothelial carcinoma, BLCA; Breast invasive carcinoma, BRCA; Cervical squamous cell carcinoma and endocervical adenocarcinoma, CESC; Colon adenocarcinoma, COAD; Lymphoid neoplasm diffuse large B-cell lymphoma, DLBC; Head and neck squamous cell carcinoma, HNSC; Kidney renal clear cell carcinoma, KIRC; Kidney renal papillary cell carcinoma, KIRP; Brain lower grade glioma, LGG; Liver hepatocellular carcinoma, LIHC; Lung adenocarcinoma, LUAD; Lung squamous cell carcinoma, LUSC; Ovarian serous cystadenocarcinoma, OV; Prostate adenocarcinoma, PRAD; Rectum adenocarcinoma, READ; Skin Cutaneous Melanoma, SKCM; Stomach adenocarcinoma, STAD; Thyroid carcinoma, THCA; Uterine corpus endometrial carcinoma, UCEC. The levels of angiogenic factors at 48 hrs following (b) siEGR1 and (c) siHOXB9 treatment in RCC4 and A498 cells (n=3, student *t*-test). (d) Tube formation potential of RF24 cells following incubation with conditioned media collected from control miRNA or miR-192 treated RCC4-EV or RCC4-EGR1+HOXB9 cells. Bar graph (right) shows the quantitative analyses of number of nodes per field (n=5, student *t*-test). Scale bar, 100  $\mu$ m. All bars and error bars represent mean values and the corresponding SEMs (\*,  $P < 0.05$ ; \*\*,  $P < 0.01$ ; \*\*\*,  $P < 0.001$ ; and \*\*\*\*,  $P < 0.0001$ ).

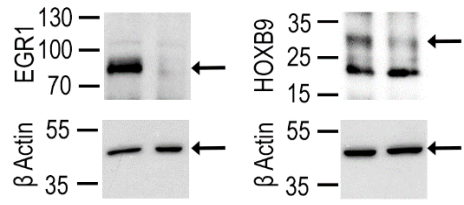

**Supplementary Fig. 7. Full scans of Western blots.** Full scans of blots from Supplementary Figure 2e.

## Supplementary Tables

**Supplementary Table 1.** Correlation between miRNA levels and angiogenic scores in HGSC tumors (Spearman correlation tests).

|                 | <b>Correlation coefficient<br/>(with angiogenic scores)</b> | <b>P-values</b> |
|-----------------|-------------------------------------------------------------|-----------------|
| <b>miR-96</b>   | -0.2                                                        | <0.0001         |
| <b>miR-181c</b> | -0.07                                                       | 0.0873          |
| <b>miR-182</b>  | -0.13                                                       | 0.0018          |
| <b>miR-191</b>  | -0.09                                                       | 0.0319          |
| <b>miR-192</b>  | -0.24                                                       | <0.0001         |
| <b>miR-194</b>  | -0.17                                                       | <0.0001         |
| <b>miR-200b</b> | -0.18                                                       | <0.0001         |
| <b>miR-205</b>  | 0.01                                                        | 0.7908          |
| <b>miR-522</b>  | 0.02                                                        | 0.6511          |
| <b>miR-663</b>  | 0.02                                                        | 0.7103          |

**Supplementary Table 2.** Correlation of clinical and pathological features with miR-192 levels in 128 patients with invasive epithelial ovarian carcinoma.

| <b>Variable</b>                |            | <b>miR-192 Expression</b> |                        | <b>P value</b> | <b>Statistical Tests</b> |
|--------------------------------|------------|---------------------------|------------------------|----------------|--------------------------|
|                                |            | <b>Low<br/>(N=40)</b>     | <b>High<br/>(N=88)</b> |                |                          |
| <b>Tumor grade – no. (%)</b>   | Low        | 2                         | 6                      | 0.69           | Chi-square test          |
|                                | High       | 38                        | 82                     |                |                          |
| <b>Tumor stage – no. (%)</b>   | I or II    | 5                         | 14                     | 0.62           | Chi-square test          |
|                                | III or IV  | 35                        | 74                     |                |                          |
| <b>Histology – no. (%)</b>     | Serous     | 36                        | 78                     | 0.82           | Chi-square test          |
|                                | Others     | 4                         | 10                     |                |                          |
| <b>Cytoreduction – no. (%)</b> | Optimal    | 19                        | 43                     | 0.89           | Chi-square test          |
|                                | Suboptimal | 21                        | 45                     |                |                          |
| <b>Median OS (Yrs.)</b>        |            | 3.86                      | 6.85                   | 0.001          | Log-rank test            |
| <b>Microvessel density</b>     |            | 106.1                     | 34.6                   | <0.0001        | Student <i>t</i> -test   |

**Supplementary Table 3. Top pathways affected by miR-192.** Pathway analysis of genes that are negatively associated with miR-192 expression in TCGA ovarian dataset (*P* values were generated using the Fisher Exact Test).

| <b>Pathway</b>                       | <b>No. of molecules</b> | <b><i>P</i> values</b> |
|--------------------------------------|-------------------------|------------------------|
| Integrin signaling pathway           | 49                      | <0.001                 |
| Angiogenesis                         | 38                      | 0.004                  |
| Notch signaling pathway              | 12                      | 0.017                  |
| Alzheimer disease-presenilin pathway | 22                      | 0.048                  |
| Wnt signaling pathway                | 46                      | 0.067                  |
| Cadherin signaling pathway           | 24                      | 0.085                  |

**Supplementary Table 4.** Transcription factors predicted to be targeted by miR-192.

| <b>Transcription Factor</b> | <b>Number of predicted angiogenic factors</b> |
|-----------------------------|-----------------------------------------------|
| ZNF263                      | 18                                            |
| ZBTB7                       | 17                                            |
| PLAG1                       | 16                                            |
| STAT3                       | 14                                            |
| WT1                         | 14                                            |
| EGR1                        | 11                                            |
| TAL1_E2A                    | 11                                            |
| E2F3                        | 8                                             |
| GLIS2                       | 8                                             |
| TEAD                        | 7                                             |
| HOXB9                       | 6                                             |
| ZNF217                      | 5                                             |
| CRX                         | 5                                             |

**Supplementary Table 5.** Correlations between promoter methylation and miR-192 expression levels in TCGA databases. Spearman correlation analysis was used to generate *P* values.

| Cancer Types |                 | Methylation Probe             |                               |                               |                               |
|--------------|-----------------|-------------------------------|-------------------------------|-------------------------------|-------------------------------|
|              |                 | MiR192-cg02258444-11-64658622 | MiR192-cg09349409-11-64658765 | MiR192-cg18262830-11-64658819 | MiR192-cg27083891-11-64658726 |
| BLCA         | Correlation     | -0.077                        | -0.112                        | -0.164                        | 0.031                         |
|              | <i>P</i> values | 0.131                         | 0.029                         | 0.001                         | 0.546                         |
| BRCA         | Correlation     | -0.031                        | 0.018                         | 0.231                         | 0.001                         |
|              | <i>P</i> values | 0.432                         | 0.651                         | <0.0005                       | 0.974                         |
| CESC         | Correlation     | -0.093                        | -0.245                        | -0.236                        | 0.027                         |
|              | <i>P</i> values | 0.135                         | <0.0005                       | <0.0005                       | 0.662                         |
| COAD         | Correlation     | -0.594                        | -0.563                        | -0.546                        | -0.576                        |
|              | <i>P</i> values | <0.0005                       | <0.0005                       | <0.0005                       | <0.0005                       |
| DLBC         | Correlation     | 0.106                         | 0.012                         | 0.124                         | -0.051                        |
|              | <i>P</i> values | 0.478                         | 0.934                         | 0.404                         | 0.732                         |
| HNSC         | Correlation     | 0.225                         | 0.236                         | 0.258                         | 0.188                         |
|              | <i>P</i> values | <0.0005                       | <0.0005                       | <0.0005                       | <0.0005                       |
| KIRC         | Correlation     | -0.627                        | -0.613                        | -0.573                        | -0.612                        |
|              | <i>P</i> values | <0.0005                       | <0.0005                       | <0.0005                       | <0.0005                       |
| KIRP         | Correlation     | -0.84                         | 0.764                         | -0.702                        | -0.764                        |
|              | <i>P</i> values | <0.0005                       | <0.0005                       | <0.0005                       | <0.0005                       |
| LGG          | Correlation     | 0.031                         | 0.039                         | 0.16                          | 0.121                         |
|              | <i>P</i> values | 0.477                         | 0.377                         | <0.0005                       | 0.005                         |
| LIHC         | Correlation     | -0.652                        | -0.621                        | -0.556                        | -0.642                        |
|              | <i>P</i> values | <0.0005                       | <0.0005                       | <0.0005                       | <0.0005                       |
| LUAD         | Correlation     | -0.39                         | -0.396                        | -0.364                        | -0.369                        |
|              | <i>P</i> values | <0.0005                       | <0.0005                       | <0.0005                       | <0.0005                       |
| LUSC         | Correlation     | 0.164                         | 0.127                         | 0.021                         | 0.221                         |
|              | <i>P</i> values | 0.003                         | 0.02                          | 0.699                         | <0.0005                       |
| PRAD         | Correlation     | -0.084                        | -0.109                        | 0.143                         | 0.123                         |
|              | <i>P</i> values | 0.073                         | 0.02                          | 0.002                         | 0.009                         |
| READ         | Correlation     | -0.599                        | -0.605                        | -0.57                         | -0.631                        |
|              | <i>P</i> values | <0.0005                       | <0.0005                       | <0.0005                       | <0.0005                       |
| SKCM         | Correlation     | -0.039                        | 0.064                         | 0.056                         | 0.094                         |
|              | <i>P</i> values | 0.418                         | 0.179                         | 0.242                         | 0.049                         |
| STAD         | Correlation     | -0.63                         | -0.585                        | -0.553                        | -0.635                        |
|              | <i>P</i> values | <0.0005                       | <0.0005                       | <0.0005                       | <0.0005                       |
| THCA         | Correlation     | -0.101                        | -0.013                        | -0.032                        | -0.05                         |
|              | <i>P</i> values | 0.016                         | 0.753                         | 0.455                         | 0.232                         |
| UCEC         | Correlation     | -0.124                        | -0.144                        | -0.07                         | -0.126                        |
|              | <i>P</i> values | 0.009                         | 0.003                         | 0.146                         | 0.008                         |

Bladder urothelial carcinoma, BLCA; Breast invasive carcinoma, BRCA; Cervical squamous cell carcinoma and endocervical adenocarcinoma, CESC; Colon adenocarcinoma, COAD; Lymphoid neoplasm diffuse large B-cell lymphoma, DLBC; Head and neck squamous cell carcinoma, HNSC; Kidney renal clear cell carcinoma, KIRC; Kidney renal papillary cell carcinoma, KIRP; Brain lower grade glioma, LGG; Liver hepatocellular carcinoma, LIHC; Lung adenocarcinoma, LUAD; Lung squamous cell carcinoma, LUSC; Ovarian serous cystadenocarcinoma, OV; Prostate adenocarcinoma, PRAD; Rectum adenocarcinoma, READ; Skin Cutaneous Melanoma, SKCM; Stomach adenocarcinoma, STAD; Thyroid carcinoma, THCA; Uterine corpus endometrial carcinoma, UCEC.

**Supplementary Table 6.** The list of samples used for miRNA-angiogenic factor correlation analyses.

|              |              |              |              |              |
|--------------|--------------|--------------|--------------|--------------|
| TCGA-04-1331 | TCGA-04-1649 | TCGA-09-2054 | TCGA-13-0765 | TCGA-13-0903 |
| TCGA-04-1332 | TCGA-04-1651 | TCGA-09-2055 | TCGA-13-0766 | TCGA-13-0904 |
| TCGA-04-1335 | TCGA-04-1652 | TCGA-09-2056 | TCGA-13-0768 | TCGA-13-0905 |
| TCGA-04-1336 | TCGA-04-1654 | TCGA-10-0925 | TCGA-13-0791 | TCGA-13-0906 |
| TCGA-04-1337 | TCGA-04-1655 | TCGA-10-0926 | TCGA-13-0792 | TCGA-13-0908 |
| TCGA-04-1338 | TCGA-09-0364 | TCGA-10-0927 | TCGA-13-0793 | TCGA-13-0910 |
| TCGA-04-1342 | TCGA-09-0365 | TCGA-10-0928 | TCGA-13-0794 | TCGA-13-0911 |
| TCGA-04-1343 | TCGA-09-0366 | TCGA-10-0930 | TCGA-13-0795 | TCGA-13-0912 |
| TCGA-04-1346 | TCGA-09-0367 | TCGA-10-0931 | TCGA-13-0797 | TCGA-13-0913 |
| TCGA-04-1347 | TCGA-09-0369 | TCGA-10-0933 | TCGA-13-0799 | TCGA-13-0916 |
| TCGA-04-1348 | TCGA-09-1659 | TCGA-10-0934 | TCGA-13-0800 | TCGA-13-0919 |
| TCGA-04-1349 | TCGA-09-1661 | TCGA-10-0935 | TCGA-13-0801 | TCGA-13-0920 |
| TCGA-04-1350 | TCGA-09-1662 | TCGA-10-0936 | TCGA-13-0802 | TCGA-13-0921 |
| TCGA-04-1351 | TCGA-09-1664 | TCGA-10-0937 | TCGA-13-0803 | TCGA-13-0923 |
| TCGA-04-1356 | TCGA-09-1665 | TCGA-10-0938 | TCGA-13-0804 | TCGA-13-0924 |
| TCGA-04-1361 | TCGA-09-1666 | TCGA-13-0714 | TCGA-13-0805 | TCGA-13-1403 |
| TCGA-04-1362 | TCGA-09-1667 | TCGA-13-0717 | TCGA-13-0807 | TCGA-13-1404 |
| TCGA-04-1364 | TCGA-09-1668 | TCGA-13-0720 | TCGA-13-0883 | TCGA-13-1405 |
| TCGA-04-1365 | TCGA-09-1669 | TCGA-13-0723 | TCGA-13-0884 | TCGA-13-1407 |
| TCGA-04-1367 | TCGA-09-1670 | TCGA-13-0724 | TCGA-13-0885 | TCGA-13-1408 |
| TCGA-04-1369 | TCGA-09-1672 | TCGA-13-0725 | TCGA-13-0886 | TCGA-13-1409 |
| TCGA-04-1371 | TCGA-09-1673 | TCGA-13-0726 | TCGA-13-0887 | TCGA-13-1410 |
| TCGA-04-1514 | TCGA-09-1674 | TCGA-13-0727 | TCGA-13-0888 | TCGA-13-1411 |
| TCGA-04-1516 | TCGA-09-1675 | TCGA-13-0730 | TCGA-13-0889 | TCGA-13-1412 |
| TCGA-04-1517 | TCGA-09-2043 | TCGA-13-0751 | TCGA-13-0890 | TCGA-13-1477 |
| TCGA-04-1525 | TCGA-09-2044 | TCGA-13-0755 | TCGA-13-0891 | TCGA-13-1481 |
| TCGA-04-1530 | TCGA-09-2045 | TCGA-13-0757 | TCGA-13-0893 | TCGA-13-1482 |
| TCGA-04-1542 | TCGA-09-2048 | TCGA-13-0758 | TCGA-13-0894 | TCGA-13-1483 |
| TCGA-04-1638 | TCGA-09-2049 | TCGA-13-0760 | TCGA-13-0897 | TCGA-13-1484 |
| TCGA-04-1644 | TCGA-09-2050 | TCGA-13-0761 | TCGA-13-0899 | TCGA-13-1485 |
| TCGA-04-1646 | TCGA-09-2051 | TCGA-13-0762 | TCGA-13-0900 | TCGA-13-1487 |
| TCGA-04-1648 | TCGA-09-2053 | TCGA-13-0764 | TCGA-13-0901 | TCGA-13-1488 |



|              |              |              |              |              |
|--------------|--------------|--------------|--------------|--------------|
| TCGA-13-1489 | TCGA-23-1029 | TCGA-24-1417 | TCGA-24-1604 | TCGA-24-2297 |
| TCGA-13-1491 | TCGA-23-1030 | TCGA-24-1418 | TCGA-24-1614 | TCGA-24-2298 |
| TCGA-13-1492 | TCGA-23-1031 | TCGA-24-1419 | TCGA-24-1616 | TCGA-25-1312 |
| TCGA-13-1494 | TCGA-23-1032 | TCGA-24-1422 | TCGA-24-1842 | TCGA-25-1313 |
| TCGA-13-1495 | TCGA-23-1107 | TCGA-24-1423 | TCGA-24-1843 | TCGA-25-1314 |
| TCGA-13-1496 | TCGA-23-1109 | TCGA-24-1424 | TCGA-24-1844 | TCGA-25-1315 |
| TCGA-13-1497 | TCGA-23-1110 | TCGA-24-1425 | TCGA-24-1845 | TCGA-25-1316 |
| TCGA-13-1498 | TCGA-23-1111 | TCGA-24-1426 | TCGA-24-1846 | TCGA-25-1317 |
| TCGA-13-1499 | TCGA-23-1113 | TCGA-24-1427 | TCGA-24-1847 | TCGA-25-1318 |
| TCGA-13-1500 | TCGA-23-1114 | TCGA-24-1428 | TCGA-24-1849 | TCGA-25-1319 |
| TCGA-13-1501 | TCGA-23-1116 | TCGA-24-1430 | TCGA-24-1850 | TCGA-25-1320 |
| TCGA-13-1504 | TCGA-23-1117 | TCGA-24-1431 | TCGA-24-1852 | TCGA-25-1321 |
| TCGA-13-1505 | TCGA-23-1118 | TCGA-24-1434 | TCGA-24-1920 | TCGA-25-1322 |
| TCGA-13-1506 | TCGA-23-1119 | TCGA-24-1435 | TCGA-24-1923 | TCGA-25-1323 |
| TCGA-13-1507 | TCGA-23-1120 | TCGA-24-1436 | TCGA-24-1924 | TCGA-25-1324 |
| TCGA-13-1509 | TCGA-23-1121 | TCGA-24-1463 | TCGA-24-1927 | TCGA-25-1325 |
| TCGA-13-1510 | TCGA-23-1122 | TCGA-24-1464 | TCGA-24-1928 | TCGA-25-1326 |
| TCGA-13-1511 | TCGA-23-1123 | TCGA-24-1466 | TCGA-24-1930 | TCGA-25-1328 |
| TCGA-13-1512 | TCGA-23-1124 | TCGA-24-1467 | TCGA-24-2019 | TCGA-25-1329 |
| TCGA-13-1817 | TCGA-23-1809 | TCGA-24-1469 | TCGA-24-2020 | TCGA-25-1623 |
| TCGA-13-1819 | TCGA-23-2072 | TCGA-24-1470 | TCGA-24-2023 | TCGA-25-1625 |
| TCGA-13-2057 | TCGA-23-2077 | TCGA-24-1471 | TCGA-24-2024 | TCGA-25-1626 |
| TCGA-13-2059 | TCGA-23-2078 | TCGA-24-1474 | TCGA-24-2026 | TCGA-25-1627 |
| TCGA-13-2060 | TCGA-23-2079 | TCGA-24-1544 | TCGA-24-2027 | TCGA-25-1628 |
| TCGA-13-2061 | TCGA-23-2081 | TCGA-24-1545 | TCGA-24-2029 | TCGA-25-1630 |
| TCGA-13-2065 | TCGA-23-2084 | TCGA-24-1546 | TCGA-24-2030 | TCGA-25-1631 |
| TCGA-13-2066 | TCGA-23-2641 | TCGA-24-1548 | TCGA-24-2033 | TCGA-25-1632 |
| TCGA-13-2071 | TCGA-23-2643 | TCGA-24-1549 | TCGA-24-2035 | TCGA-25-1633 |
| TCGA-20-0987 | TCGA-23-2645 | TCGA-24-1550 | TCGA-24-2036 | TCGA-25-1634 |
| TCGA-20-0990 | TCGA-23-2647 | TCGA-24-1551 | TCGA-24-2038 | TCGA-25-1635 |
| TCGA-20-0991 | TCGA-23-2649 | TCGA-24-1552 | TCGA-24-2254 | TCGA-25-1870 |
| TCGA-20-1682 | TCGA-24-0966 | TCGA-24-1553 | TCGA-24-2260 | TCGA-25-1871 |
| TCGA-20-1683 | TCGA-24-0968 | TCGA-24-1555 | TCGA-24-2261 | TCGA-25-1877 |
| TCGA-20-1684 | TCGA-24-0970 | TCGA-24-1556 | TCGA-24-2262 | TCGA-25-1878 |
| TCGA-20-1685 | TCGA-24-0975 | TCGA-24-1557 | TCGA-24-2267 | TCGA-25-2042 |
| TCGA-20-1686 | TCGA-24-0979 | TCGA-24-1558 | TCGA-24-2271 | TCGA-25-2391 |
| TCGA-20-1687 | TCGA-24-0980 | TCGA-24-1560 | TCGA-24-2280 | TCGA-25-2392 |
| TCGA-23-1021 | TCGA-24-0982 | TCGA-24-1562 | TCGA-24-2281 | TCGA-25-2393 |
| TCGA-23-1022 | TCGA-24-1103 | TCGA-24-1563 | TCGA-24-2288 | TCGA-25-2396 |
| TCGA-23-1024 | TCGA-24-1104 | TCGA-24-1564 | TCGA-24-2289 | TCGA-25-2397 |
| TCGA-23-1026 | TCGA-24-1105 | TCGA-24-1565 | TCGA-24-2290 | TCGA-25-2398 |
| TCGA-23-1027 | TCGA-24-1413 | TCGA-24-1567 | TCGA-24-2293 | TCGA-25-2399 |
| TCGA-23-1028 | TCGA-24-1416 | TCGA-24-1603 | TCGA-24-2295 | TCGA-25-2400 |

|              |              |              |              |              |
|--------------|--------------|--------------|--------------|--------------|
| TCGA-25-2401 | TCGA-29-2427 | TCGA-36-2530 | TCGA-61-1728 | TCGA-61-2097 |
| TCGA-25-2404 | TCGA-29-2428 | TCGA-36-2532 | TCGA-61-1730 | TCGA-61-2098 |
| TCGA-25-2408 | TCGA-29-2429 | TCGA-36-2534 | TCGA-61-1733 | TCGA-61-2101 |
| TCGA-25-2409 | TCGA-29-2431 | TCGA-36-2537 | TCGA-61-1734 | TCGA-61-2102 |
| TCGA-29-1688 | TCGA-29-2432 | TCGA-36-2538 | TCGA-61-1736 | TCGA-61-2104 |
| TCGA-29-1690 | TCGA-29-2434 | TCGA-36-2540 | TCGA-61-1737 | TCGA-61-2109 |
| TCGA-29-1691 | TCGA-29-2436 | TCGA-36-2542 | TCGA-61-1738 | TCGA-61-2110 |
| TCGA-29-1692 | TCGA-30-1714 | TCGA-36-2543 | TCGA-61-1740 | TCGA-61-2111 |
| TCGA-29-1693 | TCGA-30-1718 | TCGA-36-2544 | TCGA-61-1741 | TCGA-61-2113 |
| TCGA-29-1694 | TCGA-30-1853 | TCGA-36-2545 | TCGA-61-1743 | TCGA-61-2612 |
| TCGA-29-1695 | TCGA-30-1855 | TCGA-36-2547 | TCGA-61-1895 | TCGA-61-2613 |
| TCGA-29-1696 | TCGA-30-1856 | TCGA-36-2548 | TCGA-61-1899 | TCGA-61-2614 |
| TCGA-29-1697 | TCGA-30-1857 | TCGA-36-2549 | TCGA-61-1900 |              |
| TCGA-29-1698 | TCGA-30-1859 | TCGA-36-2551 | TCGA-61-1901 |              |
| TCGA-29-1699 | TCGA-30-1860 | TCGA-36-2552 | TCGA-61-1903 |              |
| TCGA-29-1701 | TCGA-30-1861 | TCGA-42-2582 | TCGA-61-1904 |              |
| TCGA-29-1702 | TCGA-30-1862 | TCGA-42-2587 | TCGA-61-1906 |              |
| TCGA-29-1703 | TCGA-30-1866 | TCGA-42-2588 | TCGA-61-1907 |              |
| TCGA-29-1704 | TCGA-30-1867 | TCGA-42-2589 | TCGA-61-1910 |              |
| TCGA-29-1705 | TCGA-30-1880 | TCGA-42-2590 | TCGA-61-1913 |              |
| TCGA-29-1707 | TCGA-30-1887 | TCGA-42-2591 | TCGA-61-1914 |              |
| TCGA-29-1710 | TCGA-30-1891 | TCGA-57-1582 | TCGA-61-1915 |              |
| TCGA-29-1711 | TCGA-30-1892 | TCGA-57-1583 | TCGA-61-1916 |              |
| TCGA-29-1761 | TCGA-31-1944 | TCGA-57-1584 | TCGA-61-1917 |              |
| TCGA-29-1762 | TCGA-31-1946 | TCGA-57-1585 | TCGA-61-1918 |              |
| TCGA-29-1763 | TCGA-31-1950 | TCGA-57-1586 | TCGA-61-1919 |              |
| TCGA-29-1764 | TCGA-31-1951 | TCGA-57-1992 | TCGA-61-1995 |              |
| TCGA-29-1766 | TCGA-31-1953 | TCGA-57-1993 | TCGA-61-1998 |              |
| TCGA-29-1768 | TCGA-31-1955 | TCGA-57-1994 | TCGA-61-2000 |              |
| TCGA-29-1769 | TCGA-31-1956 | TCGA-59-2348 | TCGA-61-2002 |              |
| TCGA-29-1770 | TCGA-31-1959 | TCGA-59-2349 | TCGA-61-2003 |              |
| TCGA-29-1771 | TCGA-36-1568 | TCGA-59-2350 | TCGA-61-2008 |              |
| TCGA-29-1774 | TCGA-36-1569 | TCGA-59-2351 | TCGA-61-2009 |              |
| TCGA-29-1775 | TCGA-36-1570 | TCGA-59-2352 | TCGA-61-2012 |              |
| TCGA-29-1776 | TCGA-36-1571 | TCGA-59-2354 | TCGA-61-2016 |              |
| TCGA-29-1777 | TCGA-36-1574 | TCGA-59-2355 | TCGA-61-2017 |              |
| TCGA-29-1778 | TCGA-36-1575 | TCGA-59-2363 | TCGA-61-2018 |              |
| TCGA-29-1781 | TCGA-36-1576 | TCGA-59-2372 | TCGA-61-2087 |              |
| TCGA-29-1783 | TCGA-36-1577 | TCGA-61-1721 | TCGA-61-2088 |              |
| TCGA-29-1784 | TCGA-36-1578 | TCGA-61-1722 | TCGA-61-2092 |              |
| TCGA-29-1785 | TCGA-36-1580 | TCGA-61-1724 | TCGA-61-2094 |              |
| TCGA-29-2414 | TCGA-36-1581 | TCGA-61-1725 | TCGA-61-2095 |              |
| TCGA-29-2425 | TCGA-36-2529 | TCGA-61-1727 | TCGA-61-2096 |              |

**Supplementary Table 7.** List of siRNA sequences used in this study

| Gene            | SiRNA Sequences                                             |
|-----------------|-------------------------------------------------------------|
| siControl       | 5'-UUAUGCCGAUCGCGUCACATT-3'<br>3'-TTAAUACGGCUAGCGCAGUGU-5'  |
| siEGR1 (Seq 1)  | 5'-CCAACGACAGCAGUCCCAUTT-3'<br>3'-TTGGUUGCUGUCGUCAGGGUA-5'  |
| siEGR1 (Seq 2)  | 5'-CAAAGAACUUGAUUUUGCAUTT-3'<br>3'-TTGUUUCUUGAACUAAACGUA-5' |
| siHOXB9 (Seq 1) | 5'-CUAAGAAUGUGAUGGGCCATT-3'<br>3'-TTGAUUCUUACACUACCCGGU-5'  |
| siHOXB9 (Seq 2) | 5'-CUUGCCUGUUUCUUCUCUATT-3'<br>3'-TTGAACGGACAAAGAAGAGAU-5'  |

**Supplementary Table 8.** Primer sequences for RT-PCR.

| Gene           | Primer Sequences           |
|----------------|----------------------------|
| $\beta$ -actin | 5'-AGCCTCGCCTTTGCCGA-3'    |
|                | 5'-CTGGTGCCTGGGGCG-3'      |
| EGR1           | 5'-GTTTGGCTGGGGTAACTGGT-3' |
|                | 5'-AGCCCTACGAGCACCTGAC-3'  |
| HOXB9          | 5'-TCCAGCGTCTGGTATTTGGT-3' |
|                | 5'-GAAGCGAGGACAAAGAGAGG-3' |
| CRX            | 5'-GACACTGAGGCCCAAGTCAG-3' |
|                | 5'-TGTTTCCTTCAGCCTCTGCT-3' |
| E2F3           | 5'-CTAGCTCCAGCCTTCGCTTT-3' |
|                | 5'-AGCCTCCTCTACACCACGC-3'  |
| GLIS2          | 5'-TGTGCTTAAAGCGGTCCTG-3'  |
|                | 5'-AACCTGAAGATCCACAACCG-3' |
| STAT3          | 5'-CTGCTCCAGGTACCGTGTGT-3' |
|                | 5'-CCTCTGCCGGAGAAACAG-3'   |
| TEAD1          | 5'-CTTGAATGTGCAATGAAGCG-3' |
|                | 5'-CGAAGTTTGCCTCGGACTC-3'  |
| WT1            | 5'-TTGTGTGGTTATCGCTCTCG-3' |
|                | 5'-CAAATGACATCCCAGCTTGA-3' |
| ZNF217         | 5'-TCTCTTTTGTGCCATGCTGT-3' |
|                | 5'-TTGTGTGCCTGCTGGTAGTC-3' |
| ZNF263         | 5'-CTTTCCTCCTTGTCCCACCT-3' |
|                | 5'-CACGGTGCAGGAGAGTTATG-3' |

| <b>Gene</b>                             | <b>Primer Sequences</b>         |
|-----------------------------------------|---------------------------------|
| IL6                                     | 5'-GTCAGGGGTGGTTATTGCAT-3'      |
|                                         | 5'-AGTGAGGAACAAGCCAGAGC-3'      |
| CXCL1                                   | 5'-CTTCCTCCTCCCTTCTGGTC-3'      |
|                                         | 5'-GAAAGCTTGCCTCAATCCTG-3'      |
| ITGB1                                   | 5'-CAGTCCAATCCAGAAAATTGG-3'     |
|                                         | 5'-GAGTCGCGGAACAGCAG-3'         |
| EFNA1                                   | 5'-TCAGCTGCACATGTATGGTGT-3'     |
|                                         | 5'-TCTCTTGGGTCTGTGCTGC-3'       |
| ITGAV                                   | 5'-TCCAAACCACTGATGGGACT-3'      |
|                                         | 5'-GTGACTGGTCTTCTACCCGC-3'      |
| NRP1                                    | 5'-TTGCAGTCTCTGTCCTCAA-3'       |
|                                         | 5'-GAAAAATGCGAATGGCTGAT-3'      |
| FGF2                                    | 5'-AGCCAGGTAACGGTTAGCAC-3'      |
|                                         | 5'-GGAGAAGAGCGACCCTCAC-3'       |
| IL8                                     | 5'-AAATTTGGGGTGGAAAGGTT-3'      |
|                                         | 5'-TCCTGATTTCTGCAGCTCTGT-3'     |
| HIF1 $\alpha$                           | 5'-TGGCTGCATCTCGAGACTTT-3'      |
|                                         | 5'-GAAGACATCGCGGGGAC-3'         |
| IL1 $\beta$                             | 5'-AAGCCCTTGCTGTAGTGGTG-3'      |
|                                         | 5'-GAAGCTGATGGCCCTAAACA-3'      |
| ITGA6                                   | 5'-GTTGGCTCTCTGCAGTGGAA-3'      |
|                                         | 5'-CCTCTTCGGCTTCTCGCT-3'        |
| CXCL2                                   | 5'-GCTTCCTCCTTCCTTCTGGT-3'      |
|                                         | 5'-GGGCAGAAAGCTTGTCTCAA-3'      |
| ITGAE                                   | 5'-CTATGCAGAGCAGAGTGTGGA-3'     |
|                                         | 5'-TGAGGGGAAGCTGAGTGG-3'        |
| VEGF                                    | 5'-AGCTGCGCTGATAGACATCC-3'      |
|                                         | 5'-CTACCTCCACCATGCCAAGT-3'      |
| FGF1                                    | 5'-AAGGTGGTGATTTCCCCTTC-3'      |
|                                         | 5'-TGTGGAGAGAGGTACAGCCC-3'      |
| TWIST1                                  | 5'-TCCATTTTCTCCTTCTCTGGAA-3'    |
|                                         | 5'-GTCCGCGTCCCCTAGC-3'          |
| ZEB2                                    | 5'-CAATACCGTCATCCTCAGCA-3'      |
|                                         | 5'-CCAATCCAGGAGGAAAAAC-3'       |
| miR-192 promoter<br>(methylated); HeyA8 | 5'-ATGGGATATTTTTTAGAGTTTTGTC-3' |
|                                         | 5'-CTTCTTCGTAATACTAACCCTCG-3'   |

| <b>Gene</b>                                  | <b>Primer Sequences</b>          |
|----------------------------------------------|----------------------------------|
| miR-192 promoter<br>(unmethylated); HeyA8    | 5'-GGGATATTTTTTAGAGTTTTGTTGA-3'  |
|                                              | 5'-TTCTTCATAAATACTAACCCTCACC-3'  |
| miR-192 promoter<br>(methylated); SKOV3ip1   | 5'-GTTTCGGTTTTTAATTGGTTTTTC-3'   |
|                                              | 5'-CTTCTTCGTAAATACTAACCCTCG-3'   |
| miR-192 promoter<br>(unmethylated); SKOV3ip1 | 5'-GTTTTGGTTTTTAATTGGTTTTGT-3'   |
|                                              | 5'-CTTCTTCATAAATACTAACCCTCACC-3' |
| ChIP - miR-192                               | 5'-TCACCGAGGCTTCTTATCATC         |
|                                              | 5'-GACTTTGCCAGGAAGGAG            |
| ChIP - IL6                                   | 5'-GCGATGGAGTCAGAGGAAAC-3'       |
|                                              | 5'-GGCTAGAATTTAGCGTTCAG-3'       |
| ChIP - EFNA1                                 | 5'-AGACCCACAAGTGAGCGAAC-3'       |
|                                              | 5'-TGCAGGAAAGAGCGAAGC-3'         |
| ChIP - IL1 $\beta$                           | 5'-TTTCTCAGCCTCCTACTTCTGC-3'     |
|                                              | 5'-TTGTGCCTCGAAGAGGTTTG-3'       |
| ChIP - ITGA6                                 | 5'-CCCACATCTGCAAGAACAGG-3'       |
|                                              | 5'-AGCGAGGGAGACTTTACTACCC-3'     |
| ChIP - Control                               | 5'-TTGCCAGTGGTGCATACAG-3'        |
|                                              | 5'-CACTTCGGGAAGGTTGTTG-3'        |
